# Supplementary material
Source: PubMed Central journal article supplement (PMC3358888)
Supplement: 1202681109_pnas.201202681SI.pdf [file 1202681109_pnas.201202681SI.pdf]

# Supporting Information

Zhao et al. 10.1073/pnas.1202681109

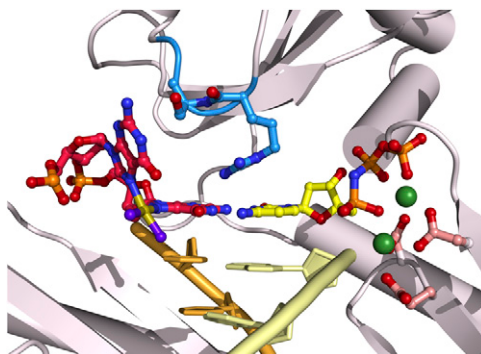

**Movie S1.** Structural changes in hPol  $\eta$  when bypassing Pt-GG. Two alternate conformations of the R61-M63 loop are associated with the stacked-in versus the open structure of Pt-GG when the 3'G serves as a templating base. The protein structure is shown in a ribbon diagram with the R61-M63 highlighted in blue. The peptide bond between R61 and S62 is flipped between two hPol  $\eta$  conformations.

[Movie S1](#)

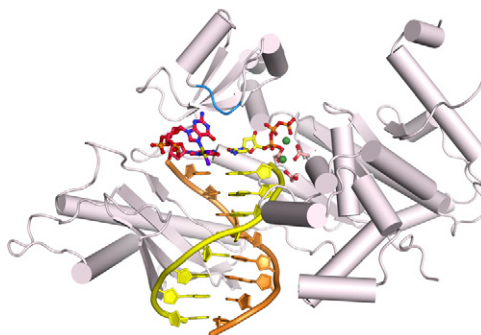

**Movie S2.** Nucleotide incorporation and product translocation in Pt-GG bypass by hPol  $\eta$ . hPol  $\eta$  is shown in light pink cartoon diagram with the R61-M63 loop highlighted in blue. The ternary complex of Pt-GG1 allows the chemistry and product formation to take place. After release of PPI and metal ions, the DNA in the binary complex as observed in Pt-GG2 translocates, and hPol  $\eta$  binds the incoming nucleotide to form the ternary complex observed in Pt-GG2.

[Movie S2](#)

## Other Supporting Information Files

[SI Appendix \(PDF\)](#)
